# Supplementary material for: Loco-Regional Therapies in Oligometastatic Adrenocortical Carcinoma
Source: MDPI journal article supplement (doi:10.3390/cancers14112730), 2022-05-31
Supplement: s1 [file s1]

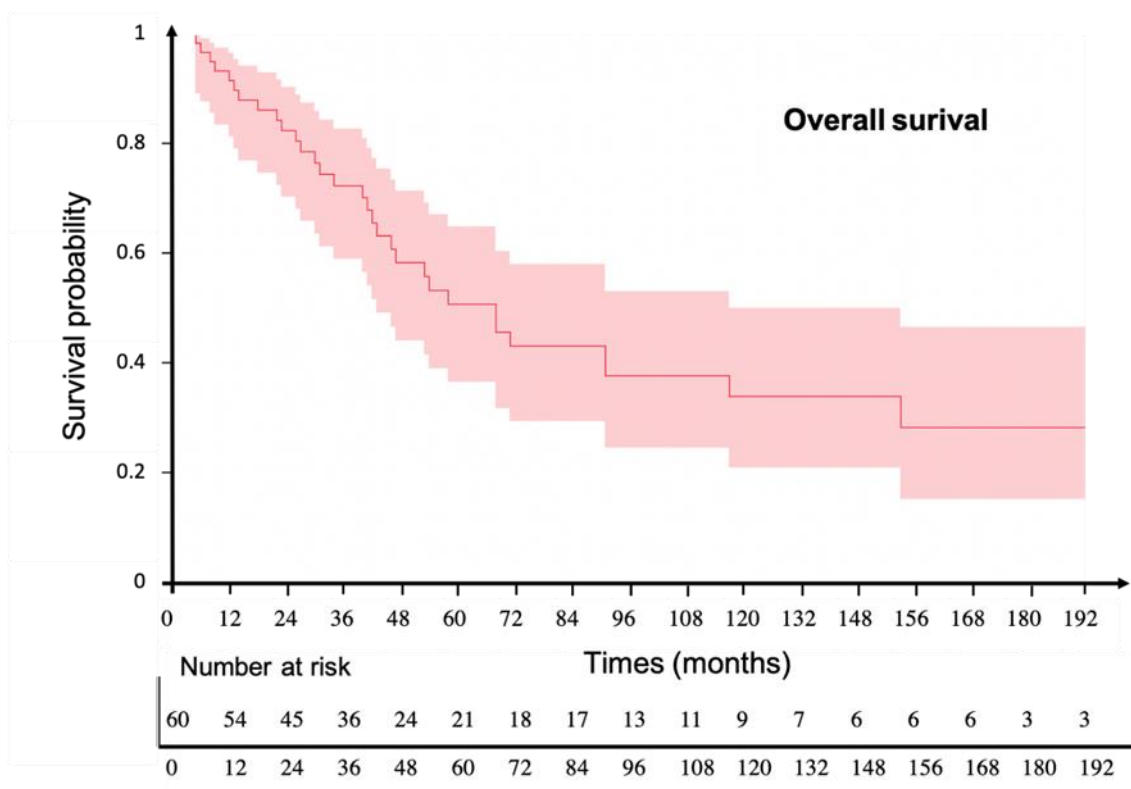

(a)

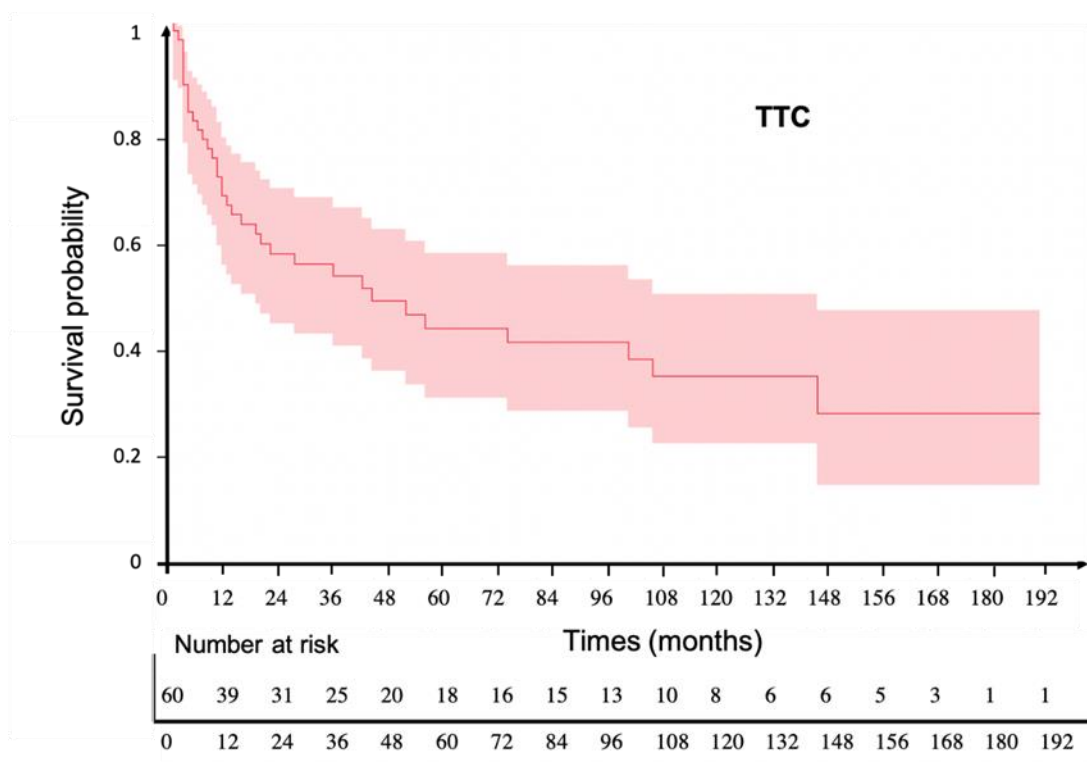

(b)

**Figure S1.** (a) Kaplan-meier estimate of overall survival since mitotane initiation. (b) Kaplan-meier estimate of time to chemotherapy since Mitotane initiation (TTC).
